# Supplementary material for: Integrative Serum Metabolic Fingerprints Based Multi‐Modal Platforms for Lung Adenocarcinoma Early Detection and Pulmonary Nodule Classification
Source: PubMed Central journal article supplement (PMC9731719; doi:10.1002/advs.202203786), 2022-10-18
Supplement: ADVS-9-2203786-s001.pdf [file ADVS-9-2203786-s001.pdf]

## Supporting Information

for *Adv. Sci.*, DOI 10.1002/advs.202203786

Integrative Serum Metabolic Fingerprints Based Multi-Modal Platforms for Lung Adenocarcinoma Early Detection and Pulmonary Nodule Classification

*Lin Wang, Mengji Zhang, Xufeng Pan, Mingna Zhao, Lin Huang, Xiaomeng Hu, Xueqing Wang, Lihua Qiao, Qiaomei Guo, Wanxing Xu, Wenli Qian, Tingjia Xue, Xiaodan Ye, Ming Li, Haixiang Su, Yinglan Kuang, Xing Lu, Xin Ye, Kun Qian\* and Jiatao Lou\**

Supporting Information

**Integrative Serum Metabolic Fingerprints Based Multi-modal Platforms for Lung Adenocarcinoma Early Detection and Pulmonary Nodule Classification**

*Lin Wang, Mengji Zhang, Xufeng Pan, Mingna Zhao, Lin Huang, Xiaomeng Hu, Xueqing Wang, Lihua Qiao, Qiaomei Guo, Wanxing Xu, Wenli Qian, Tingjia Xue, Xiaodan Ye, Ming Li, Haixiang Su, Yinglan Kuang, Xing Lu, Xin Ye, Kun Qian<sup>\*</sup>, Jiatao Lou<sup>\*</sup>*

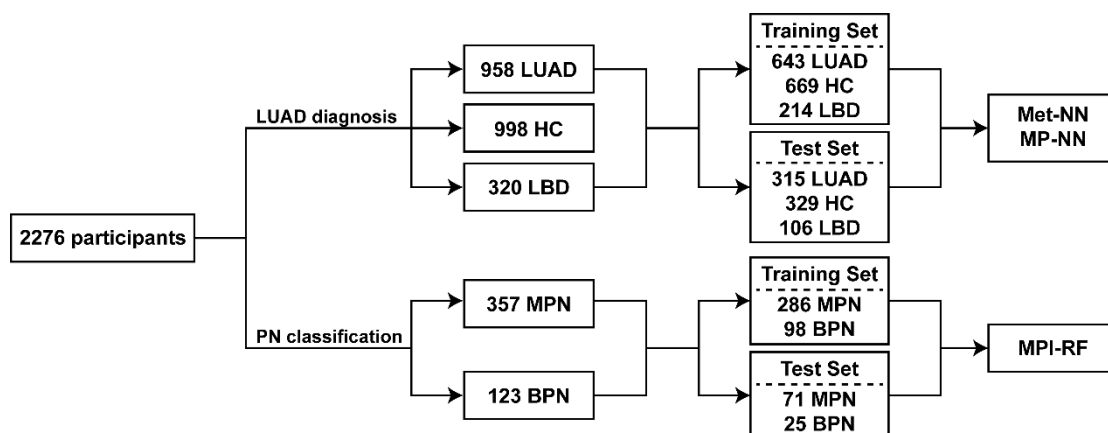

**Figure S1. Schematic flow of participants in the study.**

LUAD = Lung Adenocarcinoma. HC = Healthy Control. LBD = Lung Benign Disease. BPN = Benign Pulmonary Nodule. MPN = Malignant Pulmonary Nodule. Met-NN = Single modal model based on serum metabolic fingerprints (SMFs) by neural network. MP-NN = Dual modal model combining SMFs with protein tumor marker CEA by neural network. MPI-RF = Tri modal model integrating SMFs, protein tumor marker CEA and image features by random forest.

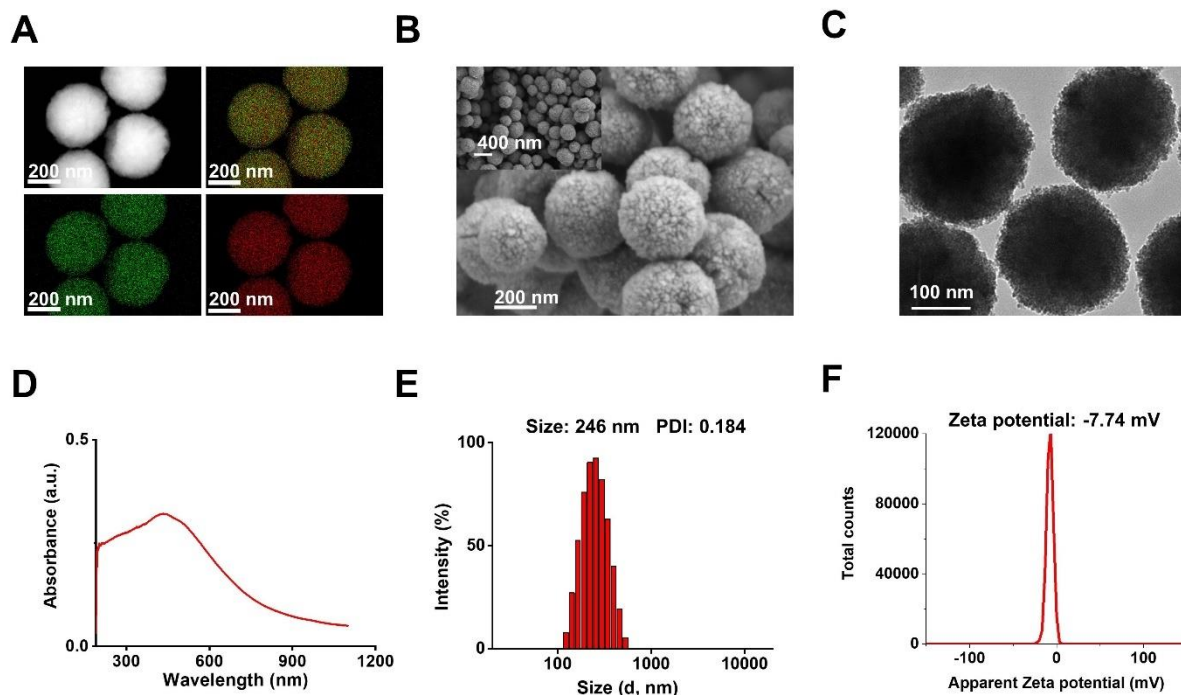

**Figure S2. Characterization of ferric nanoparticles.**

(A) Elemental mapping, (B) scanning electron microscopy (SEM) images, and (C) transmission electron microscopy (TEM) image of ferric nanoparticles. (D) Ultraviolet-visible (UV-vis) analysis of ferric nanoparticles. (E) Size distribution of ferric nanoparticles at 25°C in water by dynamic light scattering (DLS). (F) Zeta potential distribution of the ferric nanoparticles.

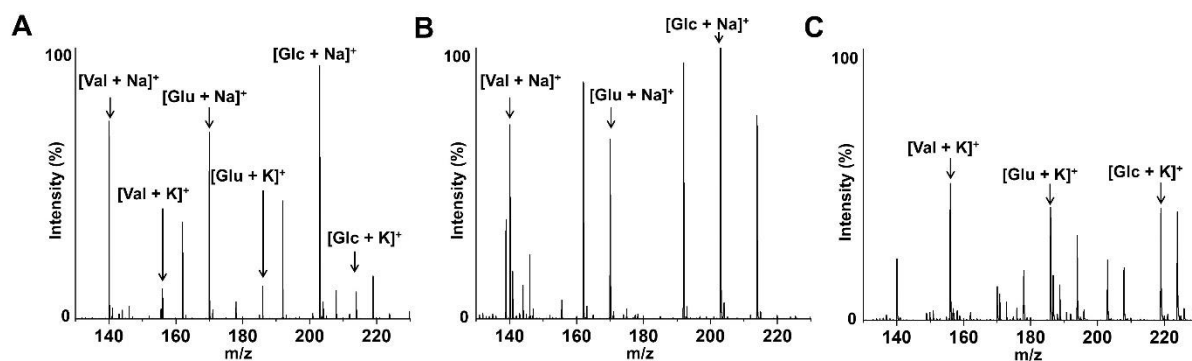

**Figure S3. Protein/salt tolerance of NPLDI MS.**

Mass spectra from NPLDI MS using samples of (A) 2 nmol valine (Val), glutamic acid (Glu), and glucose (Glc) in 5 mg/mL bovine serum albumin solution, (B) 2 nmol valine, glutamic acid, and glucose in 0.5 M NaCl solution, and (C) 2 nmol valine, glutamic acid, and glucose in 0.5 M KCl solution. All the results were recorded in positive ion mode, and Na<sup>+</sup> /K<sup>+</sup> adducts were observed.

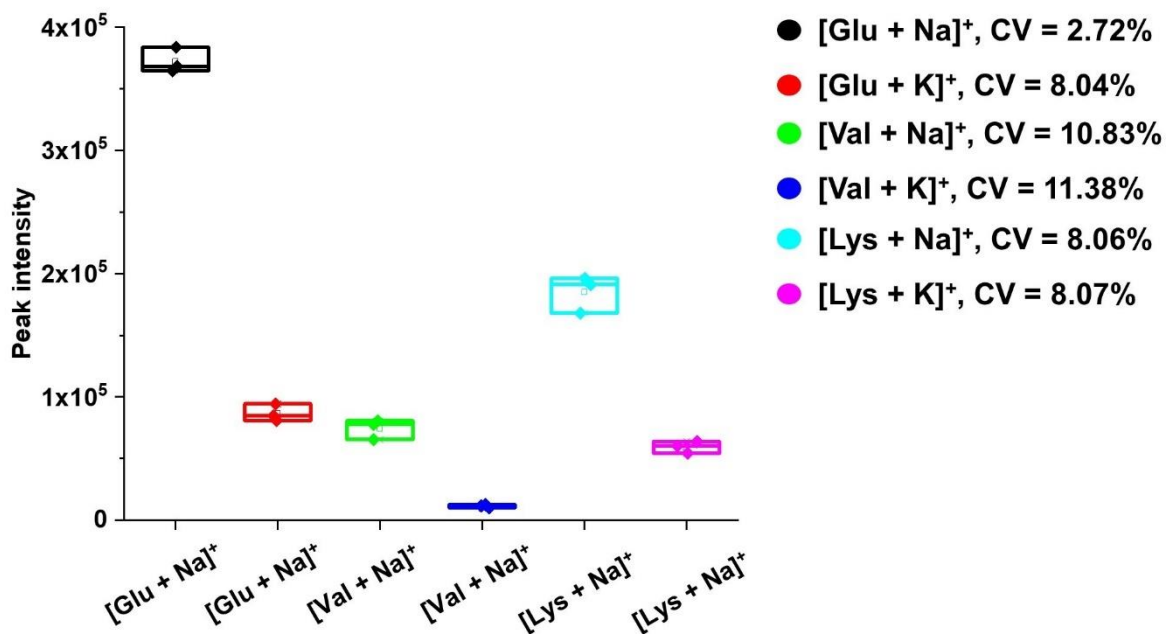

**Figure S4. Results of NPLDI MS detection in three technical replicates.**

Intensities of glucose (Glu, 1 ng/nL) of 1  $\mu$ L, valine (Val, 1 ng/nL) of 1  $\mu$ L, and lysine (Lys, 1 ng/nL) of 1  $\mu$ L using ferric nanoparticles in three technical replicates.

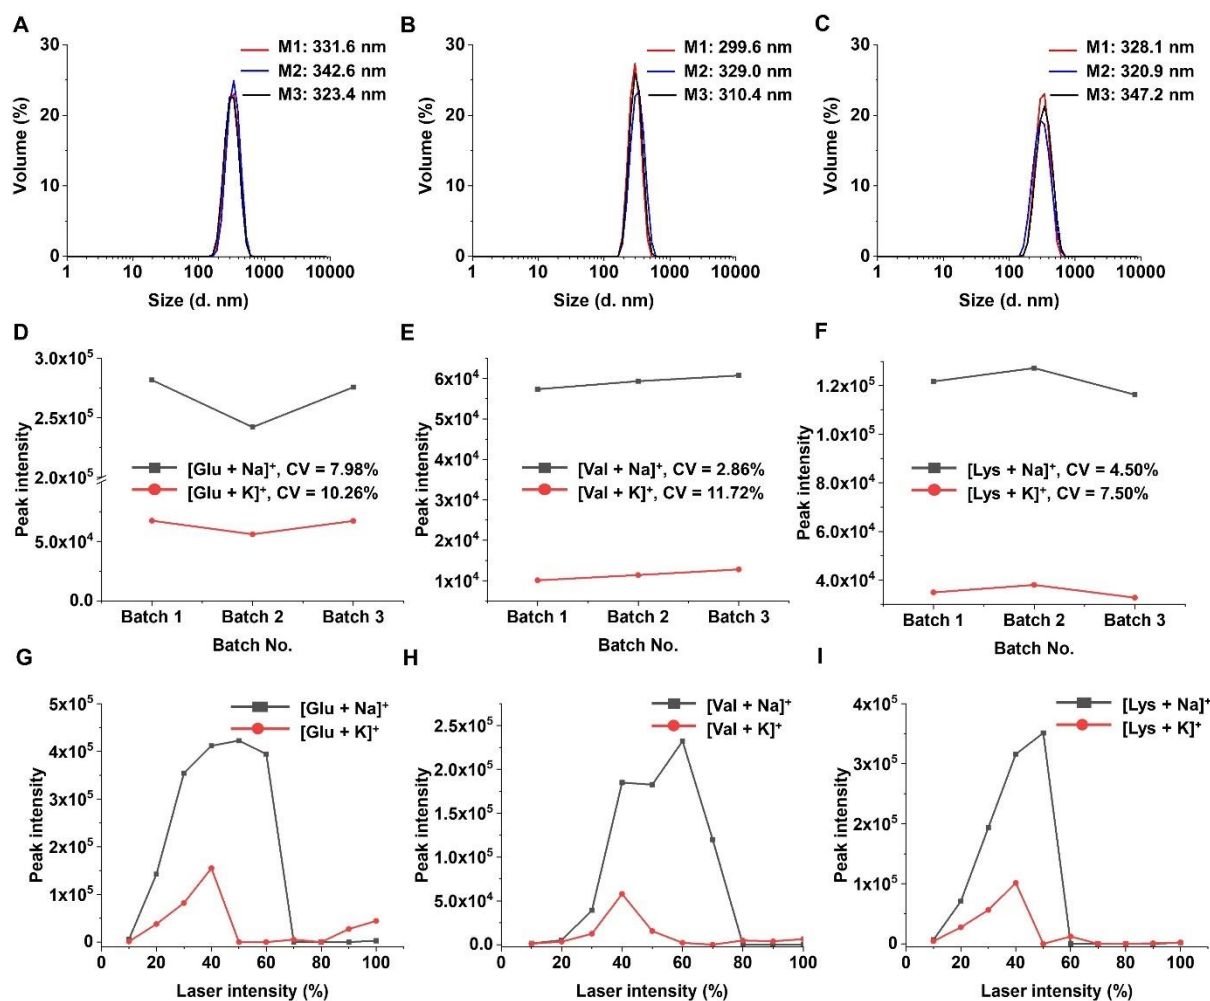

**Figure S5. NPLDI MS detection using nanoparticles from three batches and using different laser power.**

Size distribution of ferric nanoparticles from (A) batch 1, (B) batch 2, and (C) batch 3 by dynamic light scattering. Detection results of (D) glucose (Glu, 1 ng/nL) of 1  $\mu$ L, (E) valine (Val, 1 ng/nL) of 1  $\mu$ L, and (F) lysine (Lys, 1 ng/nL) of 1  $\mu$ L using ferric nanoparticles from different batches. LDI MS of glucose, valine, and lysine using different laser intensity.

Detection results of (G) glucose (Glu, 1 ng/nL) of 1  $\mu$ L, (H) valine (Val, 1 ng/nL) of 1  $\mu$ L, and (I) lysine (Lys, 1 ng/nL) of 1  $\mu$ L using ferric nanoparticles in positive mode.

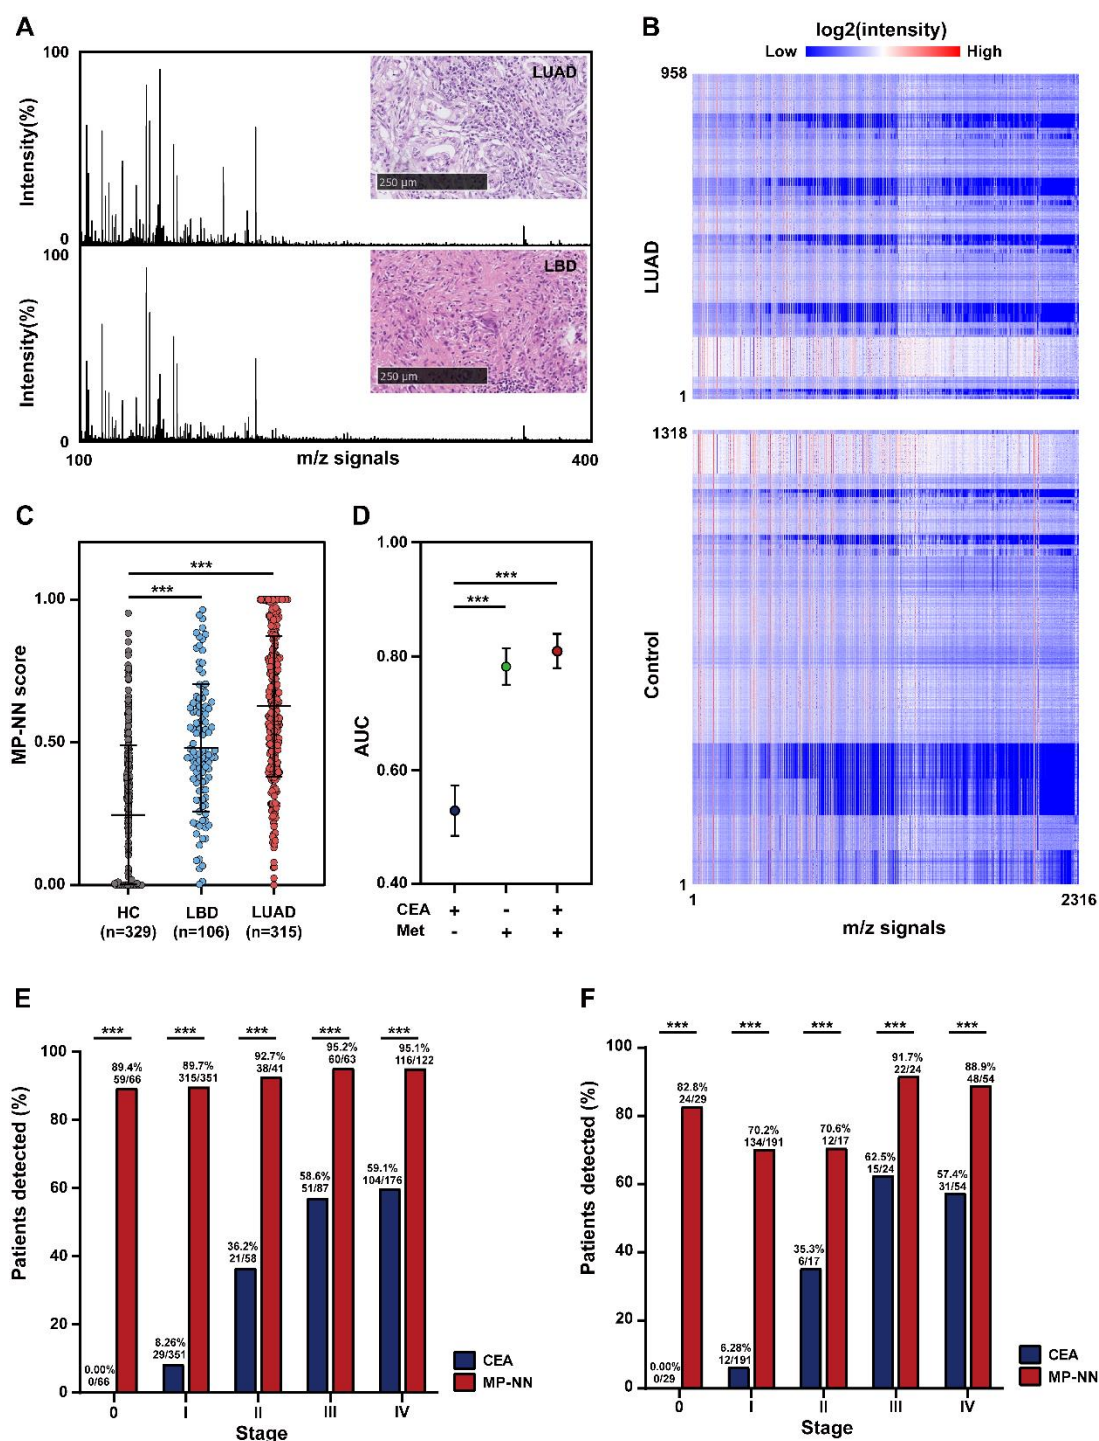

**Figure S6. Serum metabolic database construction and performance of MP-NN.**

(A) Typical metabolic mass spectrum of LUAD and LBD (granuloma). Insets show the optical images of the H&E-stained tissue sections evaluated by histopathology. (B) Extracted serum metabolic fingerprints. (C) Score of the metabolic signature identified in the test cohort. *p* values were calculated using a Wilcoxon test. Error bars indicate interquartile. (D) AUC for individual parameters in the test cohort. *p* values were calculated using a DeLong test. Error bars indicate 95% confidence intervals (CIs). (E) MP-NN detection rates summarized by



stage in the training cohort.  $p$  values were calculated using a Chi-square test. (F) MP-NN detection rates summarized by stage in the test cohort.  $p$  values were calculated using a Chi-square test. \*\*\* $p < 0.001$ .

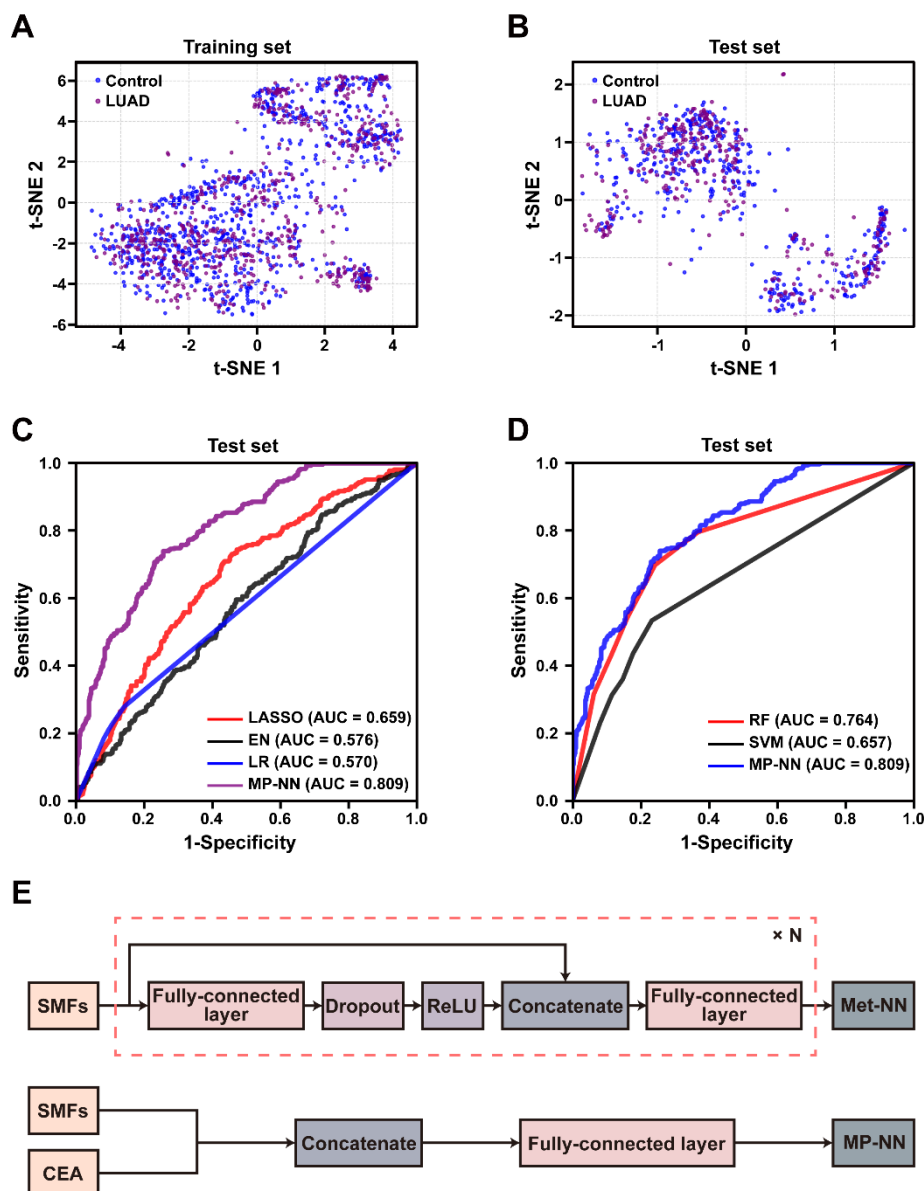

**Figure S7. Diagnostic performance of MP-NN.**

(A and B), t-SNE analysis of SMFs. Purple for the LUAD patients and blue for the controls (HC and LBD) in (A) training set and (B) test set. (C) Diagnostic performance by non-linear model (MP-NN) and linear models (elastic net (EN), least absolute shrinkage and selection operator (LASSO), and logistic regression (LR)) in blind test set. (D) Diagnostic performance by MP-NN (handling of unstructured data) and support vector machine (SVM) and random forest (handling of structured data). (E) The network architecture for construction of Met-NN and MP-NN via artificial neural network.

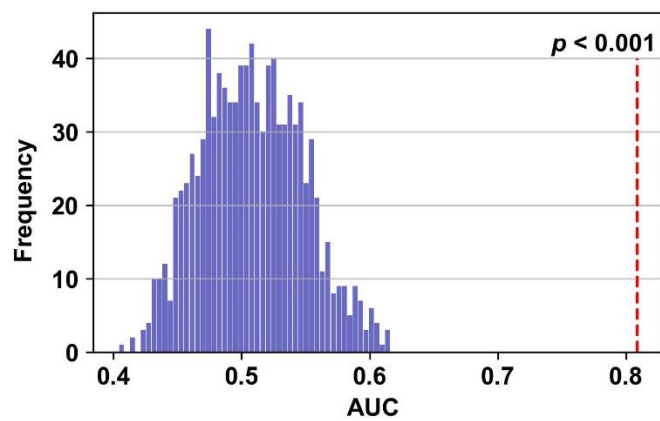

**Figure S8. Permutation test of the deep learning model MP-NN.**

Distribution of test AUC computed by the uninformative metabolic features obtained by random permutation (1,000 permutations).

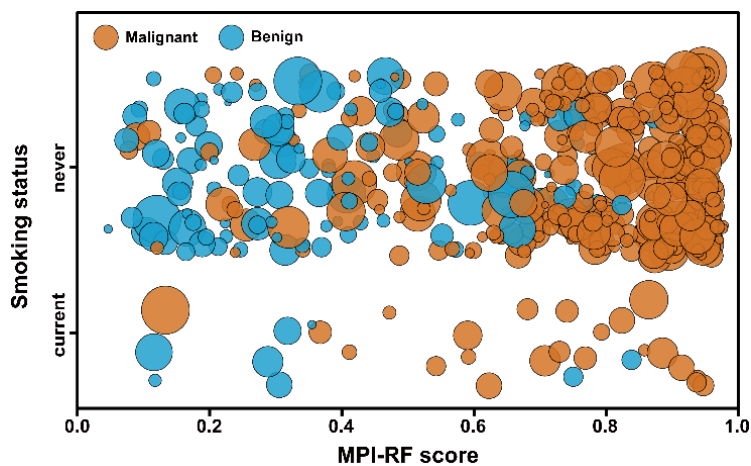

**Figure S9. Correlation analysis of clinical factors (smoking status and nodule size) with MPI-RF score.**

Multivariate analysis of clinical factors and MPI-RF scores as they relate to malignant and benign samples in the training and test set. Nodule size is represented by circle diameter.

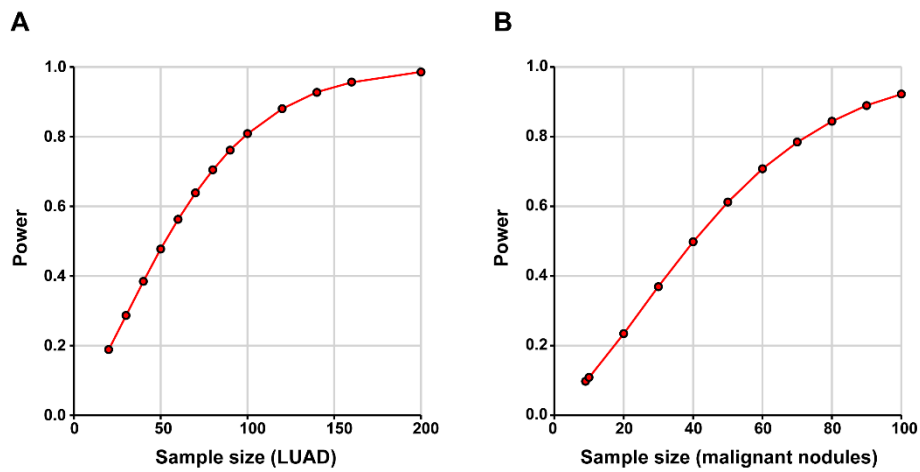

**Figure S10. Power analysis for (A) the detection of LUAD and (B) the classification of pulmonary nodule.**

**Table S1. Clinical characteristics of the enrolled participants.**

| Characteristics | Training Set      |                       |                              | Test Set          |                       |                              |
|-----------------|-------------------|-----------------------|------------------------------|-------------------|-----------------------|------------------------------|
|                 | LUAD<br>(n = 643) | Controls<br>(n = 883) | <i>p</i> value <sup>a)</sup> | LUAD<br>(n = 315) | Controls<br>(n = 435) | <i>p</i> value <sup>a)</sup> |
| Age, years      | 56 (48.5-64)      | 58 (42-67)            | 0.878                        | 55 (48-64)        | 60 (46-66)            | 0.105                        |
| Gender, n       |                   |                       |                              |                   |                       |                              |
| Male            | 265               | 368                   | 0.856                        | 105               | 168                   | 0.137                        |
| Female          | 378               | 515                   |                              | 210               | 267                   |                              |
| Histology       |                   |                       |                              |                   |                       |                              |
| LUAD            | 643               | —                     |                              | 315               | —                     |                              |
| HC              | —                 | 669                   |                              | —                 | 329                   |                              |
| LBD             |                   |                       |                              |                   |                       |                              |
| INF             | —                 | 119                   |                              | —                 | 61                    |                              |
| COPD            | —                 | 28                    |                              | —                 | 8                     |                              |
| HAM             | —                 | 17                    |                              | —                 | 8                     |                              |
| Others          | —                 | 50                    |                              | —                 | 29                    |                              |
| Stage           |                   |                       |                              |                   |                       |                              |
| 0               | 66                | —                     |                              | 29                | —                     |                              |
| I               | 351               | —                     |                              | 191               | —                     |                              |
| II              | 41                | —                     |                              | 17                | —                     |                              |
| III             | 63                | —                     |                              | 24                | —                     |                              |
| IV              | 122               | —                     |                              | 54                | —                     |                              |

Data are n, or median (range), unless otherwise specified. LUAD = lung adenocarcinoma. HC = healthy control. LBD = lung benign disease. INF = pulmonary infection. COPD = chronic obstructive pulmonary disease. HAM = hamartoma. <sup>a)</sup> The *p* values indicate the statistical significance among patients and controls.

**Table S2. Detection limit of standard metabolites by NPLDI MS.**

| <b>Analytes</b> | <b>Detection-of-limit (pmol)</b> |
|-----------------|----------------------------------|
| Glucose         | 28                               |
| Sucrose         | 1.5                              |
| Cellobiose      | 1.5                              |
| Mannitol        | 2.7                              |
| Leucine         | 38                               |
| Lysine          | 34                               |
| Methionine      | 34                               |
| Glutamic acid   | 34                               |
| Arginine        | 29                               |

**Table S3. Clinical characteristics of the enrolled participants with pulmonary nodule in CT.**

| Characteristics | Training Set                              |                                       |                              | Test Set                                 |                                       |                              |
|-----------------|-------------------------------------------|---------------------------------------|------------------------------|------------------------------------------|---------------------------------------|------------------------------|
|                 | Patients with malignant nodules (n = 286) | Patients with benign nodules (n = 98) | <i>p</i> value <sup>a)</sup> | Patients with malignant nodules (n = 71) | Patients with benign nodules (n = 25) | <i>p</i> value <sup>a)</sup> |
| Age, years      | 52.5 (47-60.8)                            | 52 (45-60)                            | 0.331                        | 54 (51-60)                               | 51 (43-58.5)                          | 0.095                        |
| Gender, n       |                                           |                                       |                              |                                          |                                       |                              |
| Male            | 100                                       | 53                                    | 0.001                        | 21                                       | 11                                    | 0.188                        |
| Female          | 186                                       | 45                                    |                              | 50                                       | 14                                    |                              |
| Smoking status  |                                           |                                       |                              |                                          |                                       |                              |
| Never           | 267                                       | 92                                    | 0.857                        | 68                                       | 24                                    | 0.961                        |
| Current         | 19                                        | 6                                     |                              | 3                                        | 1                                     |                              |
| Nodule size     |                                           |                                       |                              |                                          |                                       |                              |
| < 0.8 cm        | 58                                        | 17                                    | 0.527                        | 14                                       | 6                                     | 0.650                        |
| ≥0.8 cm         | 228                                       | 81                                    |                              | 57                                       | 19                                    |                              |
| Nodule location |                                           |                                       |                              |                                          |                                       |                              |
| LUL             | 73                                        | 22                                    | 0.657                        | 24                                       | 4                                     | 0.003                        |
| LLL             | 47                                        | 16                                    |                              | 6                                        | 8                                     |                              |
| RUL             | 89                                        | 27                                    |                              | 23                                       | 5                                     |                              |
| RML             | 20                                        | 11                                    |                              | 3                                        | 5                                     |                              |
| RLL             | 57                                        | 22                                    |                              | 15                                       | 3                                     |                              |
| Nodule type     |                                           |                                       |                              |                                          |                                       |                              |
| Pure GGN        | 88                                        | 5                                     | < 0.001                      | 26                                       | 2                                     | < 0.001                      |
| Part-solid      | 134                                       | 20                                    |                              | 32                                       | 7                                     |                              |



|                |     |    |       |    |    |       |
|----------------|-----|----|-------|----|----|-------|
| Solid          | 64  | 73 |       | 13 | 16 |       |
| Spiculation    |     |    |       |    |    |       |
| Yes            | 50  | 11 |       | 12 | 3  |       |
| No             | 236 | 87 | 0.144 | 59 | 22 | 0.562 |
| Histopathology |     |    |       |    |    |       |
| AIS            | 53  | —  |       | 19 | —  |       |
| MIA            | 86  | —  |       | 17 | —  |       |
| IA             | 147 | —  |       | 35 | —  |       |
| INF            | —   | 44 |       | —  | 14 |       |
| HAM            | —   | 20 |       | —  | 3  |       |
| Others         | —   | 34 |       | —  | 8  |       |

Data are n, or median (range), unless otherwise specified. LUL = left upper lobe. LLL = left lower lobe. RUL = right upper lobe. RML = right middle lobe. RLL = right lower lobe. GGN = ground-glass nodule. AIS=adenocarcinoma in situ. MIA = minimally invasive adenocarcinoma. IA = invasive adenocarcinoma. INF = pulmonary infection. HAM = hamartoma. <sup>a)</sup> The *p* values indicate the statistical significance among patients with benign and malignant nodules.

**Table S4. Analysis of Correlation between MPI-RF score and smoking status or nodule size.**

| <b>Risk factor</b> | <b>All samples</b> | <b><i>p</i> value</b> | <b>Malignant samples</b> | <b><i>p</i> value</b> | <b>Benign samples</b> | <b><i>p</i> value</b> |
|--------------------|--------------------|-----------------------|--------------------------|-----------------------|-----------------------|-----------------------|
| Smoking status     | 0.002              | 0.759 <sub>a)</sub>   | 0.007                    | 0.703*                | <0.001                | 0.305 <sub>a)</sub>   |
| Nodule size (mm)   | 0.004              | 0.926 <sub>b)</sub>   | 0.009                    | 0.873**               | -0.040                | 0.658 <sub>b)</sub>   |

<sup>a)</sup>*p* value of Hosmer and Lemeshow Test for Binary logistic. <sup>b)</sup>*p* value of Pearson correlation
